# Supplementary material
Source: publisher figshare collection journal article supplement (https://acs.figshare.com/ndownloader/files/21788064)
Supplement: Supplementary file 1 [file 21788064]

## Sheet: Cover page
PROPOSING THE PROMISCUOUS PROTEIN STRUCTURES IN JNK1 AND JNK3 FOR VIRTUAL SCREENING IN PURSUIT OF POTENTIAL LEADS Sailapathi Ananthasri †, Murugan Gopinath1†, Kanagasabai Somarathinam 1, Seshan Gunalan1, Rahul Jagadeesan1, Niyaz Yoosuf2, Sekar Kanagaraj3, Gugan Kothandan1* ¹Biopolymer Modelling Laboratory, Centre of Advanced Study in Crystallography and Biophysics, Guindy Campus, University of Ma…

## Sheet: S4
Supplementary 4 - Cross docking analysis of JNK3 (RMSD in Å)
PDB ID / Ligand	ANP_1JNK	984_1PMN	9HP_1PMU	537_1PMV	AIZ_2B1P	0F0_2EXC	C0M_2O0U	738_2O2U	33A_2OK1	J07_2P33	255_2R9S	SNB_2WAJ	46C_2ZDT	446_2ZDU	JNF_3CGF	JNO_3CGO	BZ9_3DA6	JK1_3FI2	JK2_3FI3	JK3_3FV8	J67_3G9L	J88_3G9N	J72_3G90	FMY_3KVX	SYY_3OXI	589_3OY1	932_3PTG	34I_3RTP	KBI_3TTI	JBI_3TTJ	AMP_4KKE	1RQ_4KKH	3EL_4U79	3H8_4W4V	3HJ_4W4W	3HN_4W4X	3HQ_4W4Y	3NL_4WHZ	3WH_4X21	519_4Y5H	4F2_4Y46	B9K_6EKD	BGE_6EMH	ACP_6EQ9
1JNK	1.3	2.16	0.79	0.89	3.01	5.08	2.87	7.78	1.88	1.45	0.94	4.23	0.78	1.5	2.1	1.09	2.94	3.19	2.85	1.14	2.36	1.28	2.38	3.51	1.45	3.19	1.43	0.85	1.75	1.53	1.87	2.9	3.26	3.61	3.14	3.48	3.17	3.77	3.64	0.67	1.36	1.78	1.46	1.33
1PMN	1.58	0.56	4.07	4.55	1.38	1.01	1.72	8.7	3.46	3.12	1.03	4.57	0.98	1.63	3.52	1.37	1.54	1.4	1.6	1.82	1.13	1.12	4.52	3.7	2.11	0.62	3.03	3.15	0.93	1.04	3.74	0.91	3.4	1.36	1.48	0.94	0.81	1.09	2.91	1.14	1.25	1.68	2.99	1.49
1PMU	2.97	4.76	0.17	2.57	2.74	2.54	3.02	9.78	1.54	1.75	1.82	4.3	3.79	4.34	3.01	1.33	2.59	2.68	2.2	4.59	2.46	2.11	1.28	2.48	1.17	5.53	1.94	1.87	1.95	3.8	2.88	3.28	6.78	3.52	2.59	2.81	2.26	3.79	5.67	2.1	5.04	1.79	1.29	3.14
1PMV	1.38	3.5	1.05	0.86	2.63	2.87	3.24	8.5	1.85	4.78	0.87	3.39	0.45	1.33	1.93	1.39	2.48	3.5	2.6	0.75	2.53	0.91	1.63	1.54	1.37	3.22	1.54	0.84	3.1	1.73	0.89	2.78	3.63	2.61	2.18	2.34	2.56	3.97	5.67	1.25	1.32	1.12	1.67	1.18
2B1P	1.17	1	3.64	1.76	1.11	0.85	1.81	9.03	2.63	3.95	1.48	1.37	1.1	0.96	3.89	1.63	1.59	0.73	0.93	1.58	0.78	0.92	1.26	3.58	1.85	1.11	1.68	2.65	0.93	0.82	0.76	1.2	1.79	1.3	0.79	0.77	1.46	1.51	1.69	1.29	1.32	1.3	3.31	1.61
2EXC	1.39	0.83	4.19	4.38	1.1	0.89	1.37	8.93	2.39	1.77	1.37	0.63	1.18	1.08	2.5	1.49	2.15	1.03	1.74	1.75	0.7	0.91	0.65	3.48	2.37	3.7	2.19	2.55	0.98	0.88	1.3	1.22	3.18	1.51	1.57	0.88	1.66	1.36	1.75	1.05	1.47	1.6	3.16	1.74
2O0U	3.54	0.92	3.33	3.54	1.32	0.94	1.55	9.34	2.84	3.29	1.48	1.56	1.7	1.48	1.28	1.57	1.59	1.12	1.46	1.35	2.08	1.11	2.17	3.76	1.88	0.64	3.27	2.17	0.99	1.07	1.36	0.34	2.04	2.05	2.13	2.23	2.03	1.54	3.03	1.57	1.32	2.42	4.27	2.97
2O2U	1.53	0.94	4.19	3.88	1.06	1.02	1.87	9.64	2.28	3.97	0.84	1.61	0.8	1.19	4.06	1.4	2.01	2.46	1.05	1.42	0.97	1	4.97	3.38	2.69	0.75	3.45	2.76	0.72	0.7	1.2	0.95	3.96	1.2	1.21	0.87	1.23	1.46	3.15	1.03	1.37	3.31	3.44	1.52
2OK1	2.79	2.79	1.07	0.95	3.57	3.29	2.68	7.67	0.62	2.59	1.9	4.16	1.92	1.59	2.24	1.53	2.19	3.16	3.31	1.34	2.76	1.15	1.75	3.13	1.69	3.29	1.7	1.12	4.83	1.48	3.03	3.58	4.19	2.74	2.19	1.8	1.88	3.53	2.31	1.55	1.62	1.91	1.7	3.58
2P33	1.49	3.49	1.19	0.83	1.91	2.46	2.39	8.08	3.24	0.36	1.14	4.17	0.88	1.42	2.17	1.02	2.91	2.58	1.65	0.96	2.21	1.21	1.51	3.59	1.05	3.22	1.11	0.66	1.68	1.74	1.16	3.42	3.58	1.74	1.98	2.07	2.01	2.33	5.53	1.32	1.41	1.81	1.76	1.33
2R9S	1.5	3.48	3.47	0.82	3.14	2.31	3.86	7.62	2.35	1.69	1	3.52	3.5	3.66	1.89	1.35	2.81	2.92	2.64	1.18	2.38	2.98	1.28	1.28	1.94	3.49	1.66	1.03	1.76	1.56	0.88	3.78	4.66	3.51	3.16	3.55	2.75	4.1	1.97	1.59	1.61	1.51	3.69	1.51
2WAJ	1.42	0.7	4.15	3.78	1.26	0.85	1.81	9.01	3.19	3.13	1.03	0.46	1	1.11	4.08	1.51	1.5	0.43	0.84	1.58	1.01	1.04	3.94	3.46	2.8	0.8	2.96	2.85	0.83	0.73	0.83	0.92	0.78	1.98	1.31	0.65	1.33	1.52	2.88	0.96	1.57	2.95	4.12	1.58
2ZDT	1.41	3.25	3.45	0.83	1.78	2.72	2.2	7.8	2.61	1.84	1.16	4.29	0.46	1.2	2.11	1.45	3.14	2.68	3.76	0.67	2.24	0.66	1.44	1.26	1.44	3.48	1.24	0.64	1.65	1.6	1.26	2.32	3.46	1.76	1.54	2.14	1.87	2.33	1.79	1.4	1.55	1.12	1.2	1.44
2ZDU	1.6	4.02	3.43	0.71	1.66	2.82	2.62	7.97	2.5	4.61	1.47	3.27	0.77	0.7	2.19	1.43	3.4	3.77	3.49	1.06	2.26	1.16	1.46	3	1.91	2.57	1.78	1.11	1.96	3.15	1.2	3.51	4	2.66	2.29	2.68	2.82	2.99	5.5	1.54	1.58	1.71	2.17	1.6
3CGF	1.15	3.42	1	0.37	3.32	2.98	2.52	7.75	1.8	1.82	1.26	4.17	0.65	1.13	0.8	1.23	2.96	2.79	2.63	0.79	2.63	0.97	1.16	3.47	1.19	3.23	1.29	0.79	2.98	1.61	1.46	2.64	3.48	3.53	3.12	2.47	3.08	2.89	3.75	1.17	1.41	1.33	1.41	1.43
3CGO	1.43	2.39	0.75	0.93	2.84	3.04	3.47	7.1	0.81	1.77	0.92	4.16	0.79	2.14	2.78	1.4	2.89	2.94	4.11	2.06	2.28	1.3	1.72	3.42	1.6	3.3	1.24	0.82	1.75	1.66	1.41	3.54	2.74	2.77	2.29	2.31	1.89	3.19	3.7	0.81	1.26	1.85	1.54	1.53
3DA6	1.65	1	3.69	3.71	1.22	0.89	1.64	8.81	3.18	1.8	1.15	0.79	2.16	2.33	3.9	1.63	0.87	0.63	1.14	1.48	1.22	1.1	3.89	3.51	2.25	1.07	3.18	2.82	0.83	0.99	1.34	0.94	0.97	1.27	1.37	0.62	0.68	1.51	2.37	1.26	1.6	2.06	4.04	1.69
3FI2	1.17	0.77	3.74	4.23	1.22	2.34	1.73	9.17	1.2	3.27	1.22	0.51	0.89	1.19	4.15	1.65	1.69	0.71	1.25	1.5	0.85	0.81	1.53	1.23	1.83	0.75	1.88	1.52	0.67	0.73	1	0.68	2.41	1.76	1.77	0.75	1.79	1.34	1.46	3.98	1.49	1.71	2.82	1.41
3FI3	1.37	1.04	4.33	4.3	1.24	1.05	1.95	9.39	1.34	4.73	1.63	1.3	0.75	0.88	3.4	1.58	2.13	0.92	1.11	1.55	0.79	0.9	1.32	3.17	1.68	0.77	1.88	1.42	0.78	0.98	0.92	0.73	3.16	1.85	1.78	1.28	1.78	1.6	2.08	1.22	1.43	0.76	1.79	1.57
3FV8	0.79	2.22	1.05	0.55	1.89	2.93	3.62	7.84	2.34	1.62	1.09	4.12	0.56	1.54	2.13	1.25	3.12	2.65	2.33	0.52	1.29	0.92	2.68	9	1.38	3.28	1.23	0.71	1.51	1.68	0.61	2.12	3.6	3.77	2.21	2.29	2.4	2.6	4.81	1.29	1.48	1.76	1.64	1.23
3G9L	1.45	0.86	4.12	1.04	1.16	0.66	2.48	9.49	1.04	1.82	1.48	0.79	2.01	2.22	4.06	1.29	2.65	1.31	1.39	1.9	0.63	0.63	0.83	3.48	1.93	0.99	2.37	2.6	1.08	1.02	1.21	1.11	4.02	1.32	1.36	0.81	0.98	1.37	2.46	1.42	1.36	1.57	1.85	1.45
3G9N	2.64	3.96	1.34	0.87	2.03	2.64	3.11	7.72	2.33	1.81	1.35	2.02	0.51	0.83	2.16	1.59	3.2	2.6	1.35	1.56	1.02	1.92	2.23	3.84	1.31	2.27	1.28	0.62	2.36	1.07	1.81	2.15	4.1	3.99	1.97	2.31	2.38	2.6	1.81	1.54	1.57	2.12	1.63	2.39
3G90	3.13	3.07	1.29	1.05	2.96	5.42	3.31	7.09	2.54	1.17	1.27	4.38	2.06	3.44	3.37	1.55	3.83	2.82	3.94	3.67	3.13	1.65	0.76	4.41	1.69	2.54	1.82	1.14	3.04	3.79	2.39	2.44	5.85	3.48	3.28	4.02	3.27	4.04	1.6	1.11	1.73	1.31	1.73	3.17
3KVX	0.87	3.1	0.83	0.76	2.93	3.06	3.54	7.81	2.01	4.94	1.15	4.28	0.77	1.42	2.12	0.94	2.7	3.2	3.42	1.02	2.65	0.95	2.37	1.04	1.33	3.67	1.24	0.95	1.71	1.63	0.4	2.36	4.61	4.08	2.79	2.46	2.56	3.71	5.25	0.89	1.54	1.3	4.38	1.11
3OXI	3.38	2.39	0.84	0.95	2.93	5.95	2.59	7.28	1.87	1.77	2.53	4.16	1.64	1.54	1.03	1.14	2.09	2.92	2.63	3.1	1.62	1.43	1.58	2.86	0.85	3.54	0.84	0.85	1.88	1.79	1.68	2.42	4.34	3.15	3.16	2.68	3.01	3.56	0.95	2.04	1.49	1.51	1.24	2.29
3OY1	1.52	0.89	4.48	4.35	1.26	1.05	1.77	8.83	3.35	3.47	1.45	1.46	0.74	0.94	4.18	1.16	2.47	0.55	0.74	1.56	0.85	0.94	4.27	3.86	2.27	0.87	2.88	3.55	0.72	0.81	1.34	1.16	3.27	1.32	1.36	1.44	1.41	1.42	2.02	0.83	1.54	3.01	2.87	2.32
3PTG	1.81	2.76	0.87	1.15	3.34	3.17	2.55	7.25	2.96	0.74	1.93	3.27	1.69	2.18	1.84	1.04	2.83	2.54	2.44	1.23	1.82	1.37	1.65	1.7	0.91	3.41	0.77	0.87	2.57	1.93	1.85	2.32	3.44	3.71	2.2	2.09	2.63	2.87	1.84	2.36	1.39	1.63	1.36	1.51
3RTP	1.74	2.35	1.03	1.03	2.43	2.89	2.69	7.99	1.81	4.94	1.3	3.15	0.55	0.93	2.19	1.12	2.61	2.66	4.07	0.91	2.21	0.84	1.18	1.26	1.56	3.21	1.26	0.62	1.8	1.68	2.18	3.32	3.61	2.81	3.05	2.5	3.04	3.39	3.84	1.52	1.49	1.07	1.5	1.87
3TTI	1.19	0.7	4.32	1.1	1.41	0.98	1.76	8.99	2.02	1.95	1.15	1.25	0.93	1.87	3.85	1.09	2.77	0.71	0.78	1.36	0.92	0.77	2.84	3.66	2.61	0.5	2.05	2.14	0.53	0.65	1.44	1.14	4.15	1.29	1.36	1.37	1.45	2.25	2.24	2.45	1.15	1.51	2.78	1.56
3TTJ	1.45	0.65	3.69	1.05	1.12	1.17	1.68	9.18	2.71	4.03	1.11	0.63	1.41	1.37	3.72	1.37	1.74	0.77	1.97	1.43	0.53	0.51	1.23	3.45	1.74	0.74	1.92	2.81	0.67	0.63	0.87	0.93	3.64	2.15	1.11	0.69	1.08	1.17	2.21	1.17	1.17	1.36	2.91	2.51
3V6R	2.25	1.85	0.67	0.96	3.05	3.29	2.48	7.21	2.77	2.05	1.56	4.17	0.88	1.19	1.09	1.15	2.4	3.18	2.94	1.52	1.42	1.29	1.52	1.36	1.47	3.33	1.37	1.63	1.68	1.48	1.37	2.52	3.25	2.87	2.32	2.42	2.04	3.05	1.8	0.85	1.07	1.76	1.36	3.09
3V6S	2.19	1.92	0.76	0.97	2.74	3.07	2.53	7.46	3.4	1.64	1.28	4.04	1.02	1.44	1.18	1.05	2.43	3.58	4.28	2.62	1.56	1.34	2.38	4.31	1.62	1.54	1.29	1.05	1.73	1.76	1.88	2.61	3.38	2.81	2.22	2.32	2.29	3.35	1.73	0.7	0.75	1.66	1.27	1.95
4H3B	4.93	4.38	4.56	2.23	3.75	4.66	2.76	7.65	4.01	4.46	1.45	4.38	3.87	4.22	4	3.02	4	3.14	2.73	2.66	3.31	3.3	3.74	5.6	2.64	4.86	3.02	2.96	3.58	3.13	3.19	3.2	4.88	4.42	3.4	4.08	3.22	4.16	5.41	5.61	5.17	5.25	3.57	4.81
4H36	5	4.74	3.32	1.23	3.26	4.43	2.97	7.15	2.17	4.14	1.85	3.57	3.83	4.03	3.87	3.83	3.96	3.11	2.76	4.25	3.22	3.66	1.94	4.93	2.13	4.26	2.98	2.9	3.18	3.37	3.24	3.14	4.82	3.45	3.33	2.85	2.75	3.75	4.15	4.89	2.56	5.4	1.56	4.68
4H39	2.71	3.96	1.72	2.21	3.93	3.43	5.05	6.65	3.18	1.59	2.34	3.65	3.42	2.52	3.89	1.8	2.04	2.91	2.66	4.03	2.91	1.91	2.17	3.59	1.21	3.17	2.15	1.4	1.93	2.05	2.32	3.08	3.91	2.76	2.37	2.1	2.76	2.43	5.69	2.06	1.71	2.38	2.17	2.68
4KKE	1.18	3.07	0.79	0.79	2.96	3.05	2.79	7.88	1.86	4.26	1.06	4.25	0.66	2.07	2.02	1.2	2.3	2.64	2.6	1.15	2.65	2.61	1.08	3.29	1.55	3.42	1.39	0.78	1.81	1.58	1.49	2.82	3.34	2.51	3.27	3	2.74	4.14	3.82	0.8	0.91	1.76	1.49	1.28
4KKG	1.58	3.1	3.46	0.84	2.96	3.05	3.13	6.97	1.44	4.35	1.32	4.25	0.77	1.21	2.24	0.9	3.05	3.18	2.43	1.17	2.38	1.28	2.4	1.27	1.5	3.6	1.75	1.49	1.75	1.56	0.98	2.6	3.22	2.59	2.65	2.48	2.45	3.65	3.59	0.74	1.62	1.6	1.49	1.24
4KKH	2.14	2.39	3.8	1.17	1.15	1.02	1.84	9.18	3.22	3.71	1.7	1.27	0.88	0.97	3.94	1.4	2.04	0.78	1.18	1.73	0.93	0.93	4.37	3.89	2.32	0.74	3.21	2	0.85	0.87	1.07	0.61	3.82	2.04	1.84	1.38	1.99	1.65	2.81	1.31	1.62	4.22	3.06	1.88
4U79	1.9	1.06	4.46	4.23	1.31	1.15	1.77	1.24	2.78	3.64	1.38	1.56	0.93	1.86	4	1.1	1.7	0.64	1.03	1.99	2.17	1.12	4.24	3.61	3.13	0.86	3.22	3.03	0.99	1.19	1.66	0.97	0.98	1.41	1.44	1.4	1.47	1.18	1.63	1.25	1.19	1.73	2.92	2.19
4W4V	4.91	4.91	3.2	1.07	1.88	1.58	1.76	9.77	3.59	6.25	1.58	4.64	4.21	4.6	3.94	2.1	4.27	0.73	1.01	2.63	1.31	3.58	3.85	4.43	1.87	3.69	3.57	3.25	1.27	3.93	4.27	3.07	1.35	1.42	1.53	0.48	1.59	1.27	6.38	4.68	4.74	2.31	2.96	4.2
4W4W	1.91	0.9	3.83	1.21	1.42	0.84	1.46	9.23	2.2	3.5	0.94	0.36	0.72	1.12	4.16	1.36	1.61	3.6	0.64	1.42	0.78	0.88	1.3	7	1.83	0.79	2.02	3.32	0.76	0.52	0.97	1.09	1.08	1.14	1.22	0.57	0.47	1.43	2.22	1.44	1.53	3.69	2.85	1.46
4W4X	5.69	3.67	3.25	2.47	2.9	0.92	1.45	10.3	3.69	4.06	1.94	4.56	4.25	4.58	3.96	2.92	5.55	1.21	0.85	6.61	2.49	3.18	2.95	4.29	1.84	5.95	3.05	2.23	1.1	3.92	4.14	1.44	2.06	1.36	1.44	0.47	0.48	1.3	6.37	4.67	4.57	2.18	2.92	5.16
4W4Y	2.85	1.77	1.23	3.32	1.75	0.87	2.24	9.64	3.03	3.06	1.53	1.51	4.22	4.61	3.91	1.65	4.29	1.15	1.07	4.16	2.42	3.21	2.77	3.33	1.9	1.12	1.98	1.95	1.31	1.29	3.61	1.86	4.05	1.56	1.58	0.68	1.7	1.29	2.75	4.68	3.13	1.08	2.91	2.36
4WHZ	3.21	2.6	3.09	1.18	1.24	1.13	1.6	9.29	3.3	2.21	1.17	0.51	3.29	3.2	4.21	1.62	1.68	0.62	0.62	2.91	0.83	0.95	1.37	3.87	1.98	1.32	1.87	1.41	0.5	0.8	1.41	1.21	3.5	1.15	1.23	0.58	0.5	1.43	2.42	1.22	1.58	4.01	2.65	2.97
4X21	2.13	3.42	1.15	0.75	2.07	2.98	2.32	7.67	3.23	0.66	1.15	4.12	0.77	1.06	1.11	1.15	2.8	2.49	2.19	1.06	3.41	1.17	1.62	3.66	1.22	3.22	1.19	0.75	1.82	1.84	1.08	2.6	3.3	2.22	2.12	2.11	2.81	3.11	0.52	1.98	1.46	1.9	1.91	2.29
4Y5H	1.26	3.13	1	0.79	2.26	2.74	2.65	6.99	2.75	4.45	1.15	4.23	0.75	1.17	1.28	0.96	2.89	2.73	2.32	1	2.32	1.16	1.59	3.38	1.42	3.15	2.04	1.95	1.63	1.63	1.81	3	3.62	2.38	2.35	2.24	2.43	2.88	1.78	0.77	1.31	1.47	0.96	1.19
4Y46	0.93	2.52	0.79	0.81	2.54	3.02	2.85	7.41	3.2	4.54	1.26	4.28	0.82	1.36	2.09	1.34	3.29	2.56	2.56	0.96	1.38	1.13	1.53	3.46	1.31	3.31	1.11	0.76	1.67	1.68	2.17	2.29	3.67	2.68	3.11	2.5	2.5	3.02	3.56	1.04	1.3	1.41	1.39	1.45
4Z9L	1.92	0.83	4.32	3.81	1.24	1.09	1.61	8.75	3.16	1.6	1.24	0.57	0.74	1.03	3.29	1.07	2.73	0.64	0.79	1.71	1.04	1.07	3.04	3.64	1.8	0.65	3.07	2.28	0.81	1.06	1.36	0.84	3.48	1.34	1.35	1.31	1.38	1.54	2.77	1.14	1.4	1.16	3.17	2.86
6EKD	1.33	2.55	0.96	0.65	2.47	2.98	1.94	8.23	3.18	4.17	1.04	3.39	0.75	1.13	2.22	1.36	3.3	2.49	4.05	0.91	1.15	0.83	1.36	1.35	1.53	1.6	1.45	0.71	1.64	1.65	2.46	2.65	3.36	2.91	2.37	2.26	3.03	2.9	3.89	1.41	1.36	1.69	1.62	1.42
6EMH	1.91	3.06	0.78	0.91	3.05	1.92	2.79	7.05	1.24	2	1.25	4.17	1	1.45	2.02	1.26	2.69	2.87	2.7	2.69	1.81	1.49	1.56	1.24	1.97	2.27	1.63	0.86	1.89	1.75	1.77	2.87	2.45	4.52	3.16	2.71	2.93	3.33	1.91	1.68	1.92	1.83	1.36	1.63
6EQ9	1.08	3.54	0.33	0.96	2.93	2.7	3.48	7.47	1.72	2.84	1.22	4.22	0.94	1.42	2.03	1.43	2.93	2.81	2.48	1.14	2.34	1.42	1.45	1.03	1.61	3.34	1.64	0.87	1.84	1.71	0.93	2.68	2.87	3.74	2.63	3.29	3.02	3.74	3.69	1.05	1.31	1.71	1.3	1.07
Mean RMSD	2.05529	2.41843	2.41235	1.77157	2.19275	2.34882	2.44882	8.13196	2.46686	2.92412	1.35157	2.93471	1.49294	1.8702	2.80588	1.45608	2.65373	2.14569	2.14333	1.86569	1.80667	1.41333	2.15118	3.27529	1.75882	2.46941	1.98255	1.68745	1.62118	1.63235	1.71471	2.12275	3.38216	2.45255	2.13078	1.93196	2.0749	2.53725	3.11314	1.71549	1.74706	2.00137	2.28647	2.09647
